# Supplementary material for: Depletion of Hemoglobin Transcripts and Long-Read Sequencing Improves the Transcriptome Annotation of the Polar Bear (Ursus maritimus)
Source: PubMed Central journal article supplement (PMC6658610; doi:10.3389/fgene.2019.00643), 2019-07-19
Supplement: DataSheet_1.pdf [file DataSheet_1.pdf]

Supplementary Data

for

**Depletion of hemoglobin transcripts and long read sequencing improves the transcriptome annotation of the polar bear (*Ursus maritimus*)**

Ashley Byrne<sup>1,2</sup>, Megan A. Supple<sup>3</sup>, Roger Volden<sup>2,4</sup>, Kristin Laidre<sup>5</sup>, Beth Shapiro<sup>3,6</sup>, Christopher Vollmers<sup>2,4</sup>

Includes:

Figures S1-S4

Tables S1 and S2

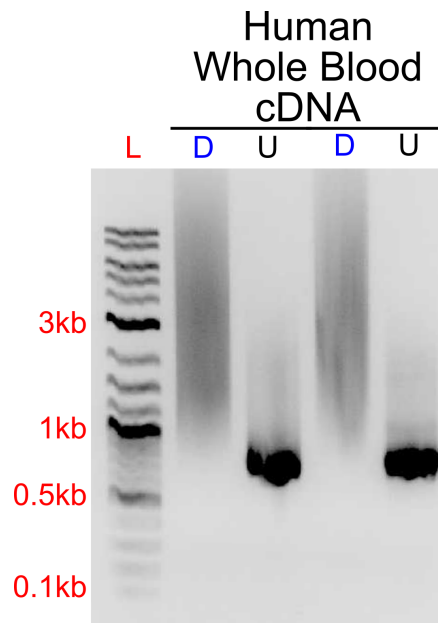

*Figure S1: Long-DASH sgRNA also depletes human hemoglobin transcripts from full-length cDNA. Technical replicates of depleted (D) or undepleted (U) human whole blood cDNA were visualized on an agarose gel. DNA ladder (L) suggests highly abundant cDNA species - putatively hemoglobin around ~700bp.*

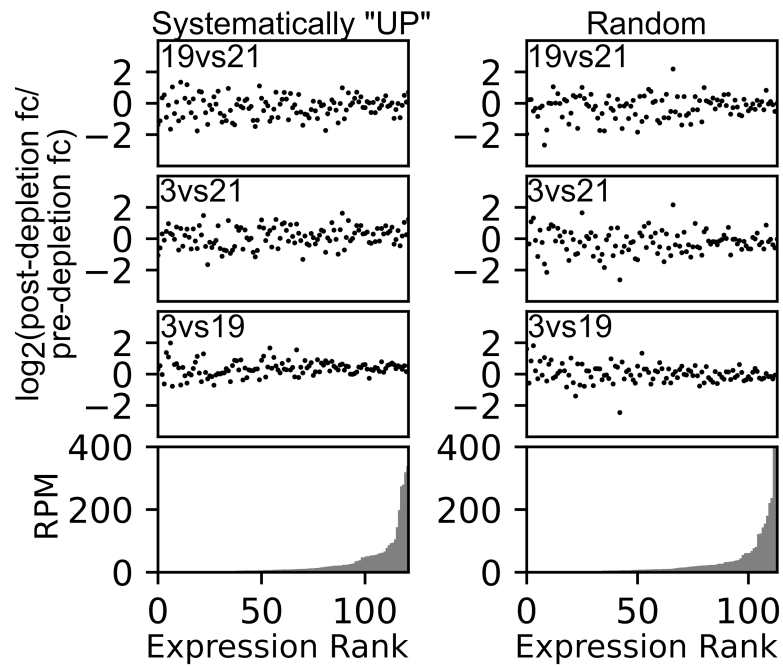

*Figure S2: Depletion of hemoglobin affects expression levels within but not fold-change between samples. Expression levels (bottom) as well as the changes in differential expression between polar bears pre- and post-depletion are shown for genes that are upregulated in all 3 polar bears post-depletion (Systematically "UP") and a random selection of genes with similar expression distribution (Random).*

## A) Hemoglobin, alpha (HBA)

|                |                                                              |     |
|----------------|--------------------------------------------------------------|-----|
| XM_008696690.1 | -----CCGCCCGCACATTTCTGGTCTCACAGACTCAGAAAGAA                  | 40  |
| NM_000558.4    | CATAAACCTGGCGGCTCGCGGCCGGGCACTTCTGGTCCCCACAGACTCAGAGAGAA     | 60  |
| NM_000517.4    | CATAAACCTGGCGGCTCGCGGCCGGGCACTTCTGGTCCCCACAGACTCAGAGAGAA     | 60  |
|                | * * * * *                                                    |     |
| XM_008696690.1 | GCCACCATGGTGCTGTCTCCCGCCGACAAGAGCAACGTCAAGGCCACCTGGGATAAGATC | 100 |
| NM_000558.4    | CCCACCATGGTGCTGTCTCCTGCCGACAAGACCAACGTCAAGGCCGCTGGGTAAGGTC   | 120 |
| NM_000517.4    | CCCACCATGGTGCTGTCTCCTGCCGACAAGACCAACGTCAAGGCCGCTGGGTAAGGTC   | 120 |
|                | *****                                                        |     |
| XM_008696690.1 | GGCAGCCACGCTGGCGAGTATGGCGGCGAGGCTCTGGAGAGGACCTTCGCGTCTTCCCC  | 160 |
| NM_000558.4    | GGCGGCGACGCTGGCGAGTATGGTGGCGAGGCCCTGGAGAGGATGTTCTGCTTCCCC    | 180 |
| NM_000517.4    | GGCGGCGACGCTGGCGAGTATGGTGGCGAGGCCCTGGAGAGGATGTTCTGCTTCC      | 180 |
|                | *** *****                                                    |     |
| XM_008696690.1 | ACCACCAAGACCTACTTCCCCACTTCGACCTGAGCCCTGGCTCCGCCAGGTCAAGGCC   | 220 |
| NM_000558.4    | ACCACCAAGACCTACTTCCCCACTTCGACCTGAGCCACGGCTCTGCCAGGTTAAGGGC   | 240 |
| NM_000517.4    | ACCACCAAGACCTACTTCCCCACTTCGACCTGAGCCACGGCTCTGCCAGGTTAAGGGC   | 240 |
|                | *****                                                        |     |
| XM_008696690.1 | CACGGCAAGAAGGTGGCCGACGCCCTGACCACCGCCGAGGCCACCTGGACGACCTGCCG  | 280 |
| NM_000558.4    | CACGGCAAGAAGGTGGCCGACGCCCTGACCACCGCCGAGGCCACCTGGACGACATGCC   | 300 |
| NM_000517.4    | CACGGCAAGAAGGTGGCCGACGCCCTGACCACCGCCGAGGCCACCTGGACGACATGCC   | 300 |
|                | *****                                                        |     |
| XM_008696690.1 | GGCGCCTGTCCGCTCTGAGGACCTGCACGCGCACAAAGCTGCGAGTGGACCCGGTCAAC  | 340 |
| NM_000558.4    | AACGCGCTGTCCGCTCTGAGGACCTGCACGCGCACAAAGCTTGGGTGGACCCGGTCAAC  | 360 |
| NM_000517.4    | AACGCGCTGTCCGCTCTGAGGACCTGCACGCGCACAAAGCTTGGGTGGACCCGGTCAAC  | 360 |
|                | *** *****                                                    |     |
| XM_008696690.1 | TTCAAGTTCCTGAGCCACTGCCTGCTGGTGACCCTGGCCAGCCACCACCCGCGGAGTTC  | 400 |
| NM_000558.4    | TTCAAGTTCCTAAGCCACTGCCTGCTGGTGACCCTGGCCAGCCACCACCCGCGGAGTTC  | 420 |
| NM_000517.4    | TTCAAGTTCCTAAGCCACTGCCTGCTGGTGACCCTGGCCAGCCACCACCCGCGGAGTTC  | 420 |
|                | *****                                                        |     |
| XM_008696690.1 | ACCCCTGCCGTCCACGCCTCCCTGGACAAGTTCCTCAGCGCCGTGAGCACCGTCTCACC  | 460 |
| NM_000558.4    | ACCCCTGCCGTGCACGCCTCCCTGGACAAGTTCCTGGCTTCTGTGAGCACCGTCTGACC  | 480 |
| NM_000517.4    | ACCCCTGCCGTGCACGCCTCCCTGGACAAGTTCCTGGCTTCTGTGAGCACCGTCTGACC  | 480 |
|                | *****                                                        |     |
| XM_008696690.1 | TCCAAATACCGTTAAGCTGGAGCCGCGGACCCCTCCCGCTCCCGGCTGGGGCCTCTTGC  | 520 |
| NM_000558.4    | TCCAAATACCGTTAAGCTGGAGCCCTGGTGGCCATGCTTCTTGGCCCTTGGGCCTCCCC  | 540 |
| NM_000517.4    | TCCAAATACCGTTAAGCTGGAGCCCTGGTGGCCATGCTTCTTGGCCCTTGGGCCTCCCC  | 540 |
|                | *****                                                        |     |
| XM_008696690.1 | GC-----TCCACGCGCTGAACCTCCCGATCTTTGAATAAAGTCTGAGTGG           | 566 |
| NM_000558.4    | CAGCCCCTCCTCCCCTTCTGCACCCGTACCCCGTGGTCTTTGAATAAAGTCTGAGTGG   | 600 |
| NM_000517.4    | CGGGCCCTCCTCCCCTCCTTGACC - GGCCCTTCTGGTCTTTGAATAAAGTCTGAGTGG | 599 |
|                | * * * * *                                                    |     |
| XM_008696690.1 | GCTGCAG-----                                                 | 573 |
| NM_000558.4    | GCGCAAAAAAAAAAAAAAAAAAAAAA                                   | 627 |
| NM_000517.4    | GCAGCAAAAAAAAAAAAAAAAAAAA---                                 | 622 |
|                | ** **                                                        |     |



## A) Construction of sgRNAs

#1 tracrRNA oligo (in Reverse Orientation/Anti-sense)

```
<-----tracrRNA-----> <-----Primer----->
5'-AAAAAGCACCGACTCGGTGCCACTTTTTCAAGTTGATAACGGACTAGCCTATTTAACTT GCTATTTCTAGCTCTAAAAC-3'
```

The oligo above is a universal tracrRNA template which allows you to generate full sgRNA templates with any target sequence oligo as long as the target sequence oligo meets the following requirements below:

1. The oligo contains the reverse complement of the primer sequence on the 3' end.
2. the oligo contains 'GG' on the 3' end of the target sequence for T7 RT.

#1 HBA1/HBA2 target oligos based upon mRNA prediction of Polar Bear/Human genes.

```
<-----T7-----><--target_sequence--><-----Primer----->
oligo 1 5'-GAAATTAATACGACTCACTATAGG AAGGCCACGGCAAGAAGG GTTTTAGAGCTAGAAATAGC-3'
<-----T7-----><--target_sequence--><-----Primer----->
oligo 2 5'-GAAATTAATACGACTCACTATAGG CACTGCCTGCTGGTGACCC GTTTTAGAGCTAGAAATAGC-3'
<-----T7-----><--target_sequence--><-----Primer----->
oligo 3 5'-GAAATTAATACGACTCACTATAGG GGTYAAGGSCCAGGCAAGA GTTTTAGAGCTAGAAATAGC-3'
<-----T7-----><--target_sequence--><-----Primer----->
oligo 4 5'-GAAATTAATACGACTCACTATAGG ACCTCCAAATACCGTAAAGC GTTTTAGAGCTAGAAATAGC-3'
<-----T7-----><--target_sequence--><-----Primer----->
oligo 5 5'-GAAATTAATACGACTCACTATAGG GCCGACAAGASCAACGTCA GTTTTAGAGCTAGAAATAGC-3'
<-----T7-----><--target_sequence--><-----Primer----->
oligo 6 5'-GAAATTAATACGACTCACTATAGG GGGAAGTAGTCTTGGTGGTG GTTTTAGAGCTAGAAATAGC-3'
<-----T7-----><--target_sequence--><-----Primer----->
oligo 7 5'-GAAATTAATACGACTCACTATAGG TCCTRAGCCACTGCCTGC GTTTTAGAGCTAGAAATAGC-3'
<-----T7-----><--target_sequence--><-----Primer----->
oligo 8 5'-GAAATTAATACGACTCACTATAGG CAGGTCGCTCAGRGGGACA GTTTTAGAGCTAGAAATAGC-3'
```

#2 HBB target oligos based upon mRNA prediction of Polar Bear/Human gene.

```
<-----T7-----><--target_sequence--><-----Primer----->
oligo 1 5'-GAAATTAATACGACTCACTATAGG CACTGTGACAAGCTGCACG GTTTTAGAGCTAGAAATAGC-3'
<-----T7-----><--target_sequence--><-----Primer----->
oligo 2 5'-GAAATTAATACGACTCACTATAGG GAAGTTGGTGGTGAGGCCCT GTTTTAGAGCTAGAAATAGC-3'
<-----T7-----><--target_sequence--><-----Primer----->
oligo 3 5'-GAAATTAATACGACTCACTATAGG CAGGCTGCCTATCAGAARG GTTTTAGAGCTAGAAATAGC-3'
<-----T7-----><--target_sequence--><-----Primer----->
oligo 4 5'-GAAATTAATACGACTCACTATAGG GCAACWCWCAASAGACACCA GTTTTAGAGCTAGAAATAGC-3'
<-----T7-----><--target_sequence--><-----Primer----->
oligo 5 5'-GAAATTAATACGACTCACTATAGG GAGGTTCTTTGABTCCTTTG GTTTTAGAGCTAGAAATAGC-3'
<-----T7-----><--target_sequence--><-----Primer----->
oligo 6 5'-GAAATTAATACGACTCACTATAGG AAGGTGAACGTGGATGAAGT GTTTTAGAGCTAGAAATAGC-3'
<-----T7-----><--target_sequence--><-----Primer----->
oligo 7 5'-GAAATTAATACGACTCACTATAGG GCTCCTGGCAACGTGC GTTTTAGAGCTAGAAATAGC-3'
<-----T7-----><--target_sequence--><-----Primer----->
oligo 8 5'-GAAATTAATACGACTCACTATAGG CAGAARGTGGTGGCTGGTG GTTTTAGAGCTAGAAATAGC-3'
```

## B) Target sequences and oligo sequences for hemoglobin depletion

| HBA targets                                                                                                             | HBB targets                                                                                             |
|-------------------------------------------------------------------------------------------------------------------------|---------------------------------------------------------------------------------------------------------|
| (1) AAGG <b>S</b> CCACGGCAAGAAGG<br>Human- AAGGGCCACGGCAAGAAGG<br>Polar- AAGGCCACGGCAAGAAGG                             | (1) CACTGTGACAAGCTGCACG<br>Human- CACTGTGACAAGCTGCACG<br>Polar- CACTGTGACAAGCTGCACG                     |
| (2) CACTGCCTGCTGGTGACCC<br>Human- CACTGCCTGCTGGTGACCC<br>Polar- CACTGCCTGCTGGTGACCC                                     | (2) GAAGTTGGTGGTGAGGCCCT<br>Human- GAAGTTGGTGGTGAGGCCCT<br>Polar- GAAGTTGGTGGTGAGGCCCT                  |
| (3) GGT <b>V</b> AAGGSCCAGCAAGA<br>Human- GGTTAAGGGCCACGGCAAGA<br>Polar- GGTC AAGGCCACGGCAAGA                           | (3) CAGGCTGCCTATCAGAA <b>R</b> G<br>Human- CAGGCTGCCTATCAGAAAG<br>Polar- CAGGCTGCCTATCAGAAG             |
| (4) ACCTCCAAATACCGTTAAGC<br>Human- ACCTCCAAATACCGTTAAGC<br>Polar- ACCTCCAAATACCGTTAAGC                                  | (4) GCAAC <b>C</b> CAAA <b>S</b> AGACACCA<br>Human- GCAACCTCAAACAGACACCA<br>Polar- GCAACCACAAAGAGACACCA |
| (5) GCCGACAAGAS <b>S</b> CAACGTCA<br>Human- GCCGACAAGACCAACGTCA<br>Polar- GCCGACAAGAGCAACGTCA                           | (5) GAGGTTCTTTGAB <b>T</b> CTCTTTG<br>Human- GAGGTTCTTTGAGTCTCTTTG<br>Polar- GAGGTTCTTTGACTCTCTTTG      |
| (6) GGGAAGTAGGTCTTGGTGGTG (r)<br>Human- GGGAAGTAGGTCTTGGTGGTG<br>Polar- GGGAAGTAGGTCTTGGTGGTG                           | (6) AAGGTGAACGTGGATGAAGT<br>Human- AAGGTGAACGTGGATGAAGT<br>Polar- AAGGTGAACGTGGATGAAGT                  |
| (7) TCCT <b>R</b> AGCCACTGCCTGC<br>Human- TCCTAAGCCACTGCCTGC<br>Polar- TCCTGAGCCACTGCCTGC                               | (7) GCTCCTGGGCAACGTGC<br>Human- GCTCCTGGGCAACGTGC<br>Polar- GCTCCTGGGCAACGTGC                           |
| (8) CAGGTCGCTCAG <b>R</b> GCGGACA (r)<br>Human- CAGGTCGCTCAGGGCGGACA (Lost PAM sequence)<br>Polar- CAGGTCGCTCAGAGCGGACA | (8) CAGAA <b>R</b> GTGGTGGCTGGTG<br>Human- CAGAAAGTGGTGGCTGGTG<br>Polar- CAGAAGTGGTGGCTGGTG             |

### Figure S4. sgRNA design and construction.

Oligonucleotides designed for hemoglobin depletion from full-length cDNA. Oligos were chosen to deplete Hemoglobin mRNA transcripts from Human and Polar Bear whole blood. A) To generate sgRNAs a template free PCR was performed to anneal the tracrRNA oligo to an oligo containing the target sequence to generate a full-length oligo. The full-length oligos were converted into sgRNA templates using in-vitro transcription. B) Target oligos used for generating sgRNAs. Degenerate bases are highlighted in grey. (r) indicates reverse orientation

| Sample Name      | Sequencer       | Run Type     | Library Prep | Read Number | Median Accuracy |
|------------------|-----------------|--------------|--------------|-------------|-----------------|
| PB3_depleted     | Illumina HiSeqX | 2X151        | Smart-seq2   | 22322746    | N/A             |
| PB19_depleted    | Illumina HiSeqX | 2X151        | Smart-seq2   | 19418607    | N/A             |
| PB21_depleted    | Illumina HiSeqX | 2X151        | Smart-seq2   | 22467660    | N/A             |
| PB3_undepleted   | Illumina HiSeqX | 2X151        | Smart-seq2   | 58088942    | N/A             |
| PB19_undepleted  | Illumina HiSeqX | 2X151        | Smart-seq2   | 105936701   | N/A             |
| PB21_undepleted  | Illumina HiSeqX | 2X151        | Smart-seq2   | 63096050    | N/A             |
| PB19_undepleted  | ONT MinION      | 9.4.1/LSK109 | R2C2         | 5313        | 93%             |
| PB3_depleted_R1  | ONT MinION      | 9.4.1/LSK109 | R2C2         | 390526      | 93%             |
| PB3_depleted_R2  | ONT MinION      | 9.4.1/LSK109 | R2C2         | 1691780     | 94%             |
| PB19_depleted_R1 | ONT MinION      | 9.4.1/LSK109 | R2C2         | 59097       | 93%             |
| PB19_depleted_R2 | ONT MinION      | 9.4.1/LSK109 | R2C2         | 866087      | 97.5%           |
| PB21_depleted    | ONT MinION      | 9.4.1/LSK109 | R2C2         | 830952      | 92%             |

**Table S1: High-throughput sequencing runs and characteristics**

*For R2C2/ONT MinION runs, fully processed R2C2 read numbers and median accuracies are given. Some R2C2/ONT MinION runs were multiplexed, sometimes with samples unrelated to this study. Samples PB19\_depleted\_R2 and PB3\_depleted\_R2 represent the current output of the R2C2/ONT MinION combination*



## RT

```
>Oligo-dT-smartseq2  
/5Me-isodC/AAGCAGTGGTATCAACGCAGAGTACTTTTTTTTTTTTTTTTTTTTTTTTTTTTTTTTTTTVN  
>TSO_Smartseq2  
AAGCAGTGGTATCAACGCAGAGTACATrGrGrG
```

## Primers for amplifying cDNA

```
>ISPCR  
AAGCAGTGGTATCAACGCAGAGT
```

## Tn5 Oligos (Smart-seq2 library prep)

```
>Tn5ME-R  
[phos]CTGTCTCTTATACACATCT  
>Tn5ME-A  
TCGTCGGCAGCGTCAGATGTGTATAAGAGACAG  
>Tn5ME-B  
GTCTCGTGGGCTCGGAGATGTGTATAAGAGACAG
```

## Primers for amplifying Tn5 Product

```
>Nextera_Primer_A  
AATGATACGGCGACCACCGAGATCTACAC [8bp i5 index] TCGTCGGCAGCGTCAGATG  
>Nextera_Primer_B  
CAAGCAGAAGACGGCATACGAGAT [8bp i7 index] GTCTCGTGGGCTCGGAGATGTGTAT
```

## R2C2 Splint\_Oligos

```
>UMI_Splint_1_Forward_ISPCR (Matches ISPCR Primer)  
ACTCTGCGTTGATACCACTGCTTTGAGGCTGATGAGTTCCATANNNNNATATANNNNNATCACTACTTAGTTTTTGGATAGCTTC  
AAGCCAGAGTTGTCTTTTTCTCTTTGCTGGCAGTAAAAG  
>UMI_Splint_1_Reverse_ISPCR (Matches ISPCR Primer)  
ACTCTGCGTTGATACCACTGCTTAAAGGGATATTTTCGATCGCANNNNNATATANNNNNTTAGTGCATTTGATCCTTTACTCCTC  
CTAAAGAACAACCTGACCCAGCAAAAGGTACACAATACTTTACTGCCAGCAAAGAG  
>UMI_Splint_2_Forward_ISPCR (Matches ISPCR Primer)  
ACTCTGCGTTGATACCACTGCTTTGCCGTTGGGTATCAATAANNNNNATATANNNNNATTGCCTTTATTCTATCTACTTAGTTT  
TGGCGATGTAGTCTACCTATCCTGATGCTGAATAAAGGC  
>UMI_Splint_2_Reverse_ISPCR (Matches ISPCR Primer)  
ACTCTGCGTTGATACCACTGCTTAATTAGTTCTAGGATCACGNNNNNATATANNNNNCTGCCATCGAAAATTTTACCCGTAA  
CAAGAACTTACAACCTCTGACGCCTATATCATGAAGGCCTTTATTTCAGCATCAGGA
```

### **Table S2 Oligos used in the manuscript**

*All oligos are shown 5'->3' and were ordered from Integrated DNA Technologies (IDT). Lower case 'r' indicates RNA bases. Spaces in sequence*
